# Supplementary material for: Analysis of the Controlling Factors of Resistivity Fluctuations in Tight Sandstone Reservoirs of the Hangjinqi Gas Field, Ordos Basin
Source: Research Square preprint supplement (doi:10.21203/rs.3.rs-5859197/v1), 2025-05-06
Supplement: Supplementary file 1 [file b4f333594c3d3efeee94dde4.docx]

Analysis of Resistivity Fluctuations and Influencing Factors in Gas-Bearing Tight Sandstone Reservoirs: A Case Study from the Lower Shihezi Formation in the Central Hangjinqi Gas Field, Ordos Basin

Liang Liu1,2, Guoshu Huang1,2,3*, Hui Ding1, Gongqiang Li4 & Senyao Ma1

1Department of Earth Science and Engineering, Shanxi Institute of Technology, Yangquan 045000, China.

2Key Laboratory of Deep Geothermal Resources, MNR, Wuhan 430074, China.

3Hubei Subsurface Multi-scale Imaging Key Laboratory, School of Geophysics and Geomatics, China University of Geosciences, Wuhan 430074, China

4North China Measurement and Control Company of Sinopec Jingwei Co., Ltd., Zhengzhou 450006, China.

Correspondence and requests for materials should be addressed to G.S.H. (email:hgsgeoman@163.com)

**Acknowledgements**

This research was supported by the Nature Science Foundation of Shanxi Province (No. 202203021211288, No. 202303021212310), National Nature Science Foundation of China (No. 42404097) and the Scientific and Technologial Innovation Programs of Higher Education Institutions in Shanxi (No. 2021L585). We also acknowledge the editors and reviewers for their constructive suggestions and comments.

**Author Contributions**

L.L. and G.S.H. wrote the main manuscript, H.D. and S.Y.M. provided technical guidance for the writing of the manuscript, and G.Q.L. provided comprehensive logging data from ten wells. All authors reviewed and consented to the publication of the manuscript.

**Additional Information**

**Competing Interests:** The authors declare that they have no competing interests.

**Data availability statement:** The authors declare that all materials and data in this paper are available, and others can replicate and build upon the authors' published claims.The datasets used and/or analysed during the current study are available from the corresponding author on reasonable request.
